# Supplementary material for: The volume of brisk walking is the key determinant of BMD improvement in premenopausal women
Source: PLoS One. 2022 Mar 16;17(3):e0265250. doi: 10.1371/journal.pone.0265250 (PMC8926180; doi:10.1371/journal.pone.0265250)
Supplement: S3 Raw data — (XLSX) [file pone.0265250.s006.xlsx]

## Sheet: Sheet1
Group	Age	PreBMD(g/m2)	AftBMD(g/m2)	Frequence	Intensity	Duration	Volume	Index
control	49	0.76	0.73	0	0	0	0	0
control	48	0.82	0.85	0	0	0	0	0
control	50	0.78	0.75	1	3	1	1	3
control	50	0.8	0.78	0	0	0	0	0
control	48	0.81	0.79	0	0	0	0	0
control	49	0.76	0.69	0	0	0	0	0
control	49	0.78	0.72	0	0	0	0	0
control	47	0.83	0.8	0	0	0	0	0
control	48	0.84	0.79	0	0	0	0	0
control	49	0.74	0.74	0	0	0	0	0
volume 8	49	0.76	0.71	4	4	2	8	32
volume 8	47	0.79	0.82	4	3	2	8	24
volume 8	49	0.81	0.79	3	3	3	9	27
volume 8	47	0.76	0.72	2	3	4	8	24
volume 12	49	0.78	0.81	3	3	4	12	36
volume 12	50	0.74	0.77	4	3	3	12	36
volume 12	47	0.78	0.76	3	3	4	12	36
volume 12	51	0.84	0.8	4	3	3	12	36
volume 12	50	0.74	0.7	3	3	4	12	36
volume 12	48	0.84	0.8	3	4	4	12	48
volume 12	50	0.79	0.8	3	3	4	12	36
volume 16	47	0.78	0.76	5	3	3	15	45
volume 16	49	0.79	0.8	4	3	4	16	48
volume 16	48	0.81	0.84	4	4	4	16	64
volume 16	49	0.83	0.8	4	3	4	16	48
volume 16	47	0.84	0.81	4	3	4	16	48
volume 16	49	0.79	0.82	4	3	4	16	48
volume 16	49	0.79	0.82	4	3	4	16	48
volume 16	51	0.79	0.81	4	3	4	16	48
volume 20	50	0.81	0.79	5	3	4	20	80
volume 20	48	0.83	0.86	5	3	4	20	60
volume 20	46	0.84	0.88	5	3	4	20	60
volume 20	50	0.78	0.85	5	3	4	20	60
volume 20	49	0.78	0.8	5	3	4	20	60
volume 20	49	0.82	0.82	5	3	4	20	60
